# Supplementary material
Source: publisher site journal article supplement (https://www.dovepress.com/article/329296)
Supplement: Supplementary file 1 [file get_supplementary_file.php]

Supplementary Table 1. Univariable and Multivariable analysis of risk factors associated with in-hospital all-cause mortality.

| Exposure | Univariable analysis | Multivariable analysis |
| --- | --- | --- |
| Age | 1.01 (1.01, 1.02) 0.0001 | 1.02 (1.01, 1.03) <0.0001 |
| Weight | 1.00 (1.00, 1.00) 0.6266 | 1.00 (0.99, 1.00) 0.0516 |
| Sex |  |  |
| Female | 1.0 | 1.0 |
| Male | 1.05 (0.89, 1.24) 0.5921 | 1.26 (1.04, 1.53) 0.0184 |
| Ethnicity |  |  |
| White | 1.0 | 1.0 |
| Black | 1.14 (0.81, 1.59) 0.4516 | 0.92 (0.63, 1.32) 0.6397 |
| Hispanic | 0.55 (0.31, 0.95) 0.0324 | 0.77 (0.42, 1.40) 0.3893 |
| Asian | 0.67 (0.36, 1.26) 0.2110 | 0.66 (0.33, 1.32) 0.2415 |
| Others | 1.38 (1.13, 1.69) 0.0015 | 1.38 (1.11, 1.72) 0.0041 |
| Careunit |  |  |
| CCU | 1.0 | 1.0 |
| CSRU | 0.33 (0.22, 0.50) <0.0001 | 0.42 (0.26, 0.68) 0.0004 |
| MICU | 1.15 (0.85, 1.55) 0.3696 | 1.12 (0.77, 1.62) 0.5495 |
| SICU | 0.82 (0.57, 1.19) 0.3004 | 0.72 (0.46, 1.12) 0.1449 |
| TSICU | 0.70 (0.48, 1.02) 0.0621 | 0.65 (0.38, 1.11) 0.1177 |
| Causes of DIC |  |  |
| Sepsis | 1.0 | 1.0 |
| Cardiovascular diseases | 0.43 (0.31, 0.61) <0.0001 | 0.98 (0.62, 1.57) 0.9484 |
| Trauma | 1.08 (0.75, 1.54) 0.6844 | 2.70 (1.59, 4.59) 0.0002 |
| SOFA | 1.15 (1.12, 1.17) <0.0001 | 0.99 (0.95, 1.03) 0.5649 |
| SAPSII | 1.04 (1.03, 1.04) <0.0001 | 1.02 (1.01, 1.03) <0.0001 |
| SIRS |  |  |
| 0 | 1.0 | 1.0 |
| 1 | 0.50 (0.11, 2.16) 0.3514 | 0.34 (0.04, 2.75) 0.3113 |
| 2 | 0.66 (0.16, 2.71) 0.5669 | 0.73 (0.10, 5.41) 0.7579 |
| 3 | 0.78 (0.19, 3.15) 0.7276 | 0.50 (0.07, 3.67) 0.4935 |
| 4 | 0.96 (0.24, 3.87) 0.9590 | 0.48 (0.06, 3.56) 0.4730 |
| JAAM-DIC |  |  |
| 4 | 1.0 | 1.0 |
| 5 | 1.60 (1.28, 2.00) <0.0001 | 1.37 (0.99, 1.90) 0.0559 |
| 6 | 2.77 (1.69, 4.54) <0.0001 | 2.43 (1.38, 4.26) 0.0021 |
| 7 | 2.59 (1.35, 4.97) 0.0042 | 2.21 (1.04, 4.68) 0.0384 |
| 8 | 2.82 (2.04, 3.90) <0.0001 | 1.90 (1.25, 2.89) 0.0026 |
| Congestive heart failure |  |  |
| No | 1.0 | 1.0 |
| Yes | 0.87 (0.72, 1.06) 0.1646 | 0.68 (0.55, 0.84) 0.0004 |
| Hypertension |  |  |
| No | 1.0 | 1.0 |
| Yes | 0.88 (0.74, 1.05) 0.1524 | 0.94 (0.77, 1.14) 0.5191 |
| COPD |  |  |
| No | 1.0 | 1.0 |
| Yes | 0.92 (0.73, 1.16) 0.4597 | 0.88 (0.69, 1.14) 0.3379 |
| Diabetes |  |  |
| No | 1.0 | 1.0 |
| Yes | 0.98 (0.80, 1.20) 0.8429 | 1.08 (0.85, 1.37) 0.5398 |
| Renal failure |  |  |
| No | 1.0 | 1.0 |
| Yes | 1.07 (0.85, 1.35) 0.5533 | 1.07 (0.80, 1.42) 0.6554 |
| Liver diseases |  |  |
| No | 1.0 | 1.0 |
| Yes | 1.69 (1.44, 2.00) <0.0001 | 1.22 (0.99, 1.52) 0.0668 |
| MBP | 0.97 (0.96, 0.98) <0.0001 | 0.98 (0.96, 1.01) 0.1963 |
| Temperature | 0.69 (0.62, 0.77) <0.0001 | 0.72 (0.63, 0.82) <0.0001 |
| SPO2 | 0.93 (0.92, 0.94) <0.0001 | 0.96 (0.95, 0.97) <0.0001 |
| Hemoglobin | 1.00 (0.96, 1.04) 0.8807 | 0.95 (0.81, 1.11) 0.4981 |
| Hematocrit | 1.00 (0.99, 1.02) 0.4704 | 1.04 (0.98, 1.09) 0.1909 |
| RBC | 0.96 (0.86, 1.07) 0.4248 | 0.94 (0.72, 1.22) 0.6248 |
| MCV | 1.04 (1.03, 1.05) <0.0001 | 1.01 (1.00, 1.03) 0.0471 |
| Platelet | 1.00 (1.00, 1.00) 0.0526 | 1.00 (1.00, 1.00) 0.0250 |
| WBC | 1.00 (1.00, 1.01) 0.2615 | 1.00 (1.00, 1.01) 0.7774 |
| APTT | 1.01 (1.00, 1.01) <0.0001 | 1.01 (1.00, 1.01) 0.0012 |
| PT | 1.01 (1.01, 1.02) <0.0001 | 1.00 (0.99, 1.01) 0.5632 |
| PT-INR | 1.04 (1.02, 1.06) <0.0001 | 1.05 (1.00, 1.10) 0.0660 |
| Creatinine | 1.06 (1.02, 1.11) 0.0013 | 0.88 (0.80, 0.95) 0.0026 |
| Urea nitrogen | 1.01 (1.01, 1.01) <0.0001 | 1.00 (1.00, 1.01) 0.4018 |
| Glucose | 1.00 (1.00, 1.00) 0.5448 | 1.00 (1.00, 1.00) 0.5972 |
| Potassium | 1.15 (1.05, 1.27) 0.0026 | 1.10 (0.97, 1.23) 0.1266 |
| Sodium | 1.01 (0.99, 1.02) 0.2175 | 1.01 (1.00, 1.03) 0.1609 |
| Bicarbonate | 0.93 (0.92, 0.95) <0.0001 | 1.03 (1.01, 1.05) 0.0100 |
| Anion gap | 1.07 (1.06, 1.09) <0.0001 | 1.05 (1.02, 1.07) <0.0001 |
| RDW | 1.11 (1.08, 1.14) <0.0001 | 1.08 (1.04, 1.12) <0.0001 |
| RDW (dichotomous) |  |  |
| Normal (<=15.5%) | 1.0 (Ref) | 1.0 (Ref) |
| Elevated(>15.5%) | 1.87 (1.57, 2.21) <0.0001 | 1.66 (1.36, 2.03) <0.0001 |
| Use of CRRT |  |  |
| No | 1.0 | 1.0 |
| Yes | 1.60 (1.30, 1.96) <0.0001 | 0.93 (0.73, 1.20) 0.5989 |
| Use of vasopressor drugs |  |  |
| No | 1.0 | 1.0 |
| Yes | 1.91 (1.58, 2.30) <0.0001 | 1.35 (1.03, 1.77) 0.0278 |
| Use of m**echanical ventilation** |  |  |
| No | 1.0 | 1.0 |
| Yes | 1.25 (1.02, 1.52) 0.0305 | 1.21 (0.91, 1.60) 0.1984 |

CCU: Coronary Care Unit. CSRU: Cardiac Surgery Recovery Unit. MICU: Medical Intensive Care Unit. SICU: Surgical Intensive Care Unit. TSICU: Trauma/Surgical Intensive Care Unit. DIC: disseminated intravascular coagulation. SOFA: sequential organ failure assessment. SAPSII: simplified acute physiology score II. SIRS: systemic inflammatory response syndrome. JAAM: **Japanese Association of Acute Medicine.** COPD: chronic obstructive pulmonary disease. MBP: mean blood pressure. RBC: red blood cell. MCV: mean corpuscular volume. WBC: white blood cell. APTT: activated partial thromboplastin time. PT: prothrombin time. INR: international normalized ratio. RDW: red blood cell distribution. CRRT: **continuous renal replacement therapy.**
